# Supplementary material for: Oenanthe javanica Ethanolic Extract Alleviates Inflammation and Modifies Gut Microbiota in Mice with DSS-Induced Colitis
Source: MDPI journal article supplement (doi:10.3390/antiox11122429), 2022-12-09
Supplement: s1 [file s1]

Table S1. Sequences and accession numbers for primers (forward, FOR; reverse, REV) used in real-time RT-PCR

| Gene                           | Sequences for primers      | Accession No. |
|--------------------------------|----------------------------|---------------|
| <i>iNOS</i>                    | FOR: CTCACTGGGACAGCACAGAA  | NM_010927     |
|                                | REV: GGTCAAACCTCTTGGGGTTCA |               |
| <i>COX-2</i>                   | FOR: TACAGAATTGAAAGCCCTCT  | NM_011198     |
|                                | REV: GCTCGGCTTCCAGTATTGAG  |               |
| <i>TNF-<math>\alpha</math></i> | FOR: AGGGTCTGGGCCATAGAACT  | NM_013693     |
|                                | REV: CCACCACGCTCTTCTGTCTAC |               |
| <i>IL-1<math>\beta</math></i>  | FOR: GGTCAAAGGTTTGAAGCAG   | NM_008361     |
|                                | REV: TGTGAAATGCCACCTTTTGA  |               |
| <i>IL-6</i>                    | FOR: AGGGTCTGGGCCATAGAACT  | NM_031168     |
|                                | REV: CCACCACGCTCTTCTGTCTAC |               |
| <i>F4/80 (Adgre1)</i>          | FOR: TTCCTCGCCTGCTTCTTC    | NM_010130     |
|                                | REV: CCCCGTCTCTGTATTCAACC  |               |
| <i>CD11/c</i>                  | FOR: CACTCAGTGAAGTCCCAAAA  | NM_021334     |
|                                | REV: CCTCAAGACAGGACATCGCT  |               |
| <i>CCR2</i>                    | FOR: AGCACATGTGGTGAATCCAA  | NM_009915     |
|                                | REV: TGCCATCATAAAGGAGCCA   |               |
| <i>CCL2(MCP-1)</i>             | FOR: ATTGGGATCATCTTGCTGGT  | NM_011333     |
|                                | REV: CCTGCTGTTACAGTTGCC    |               |
| <i>ICAM-1</i>                  | FOR: AACAGTTCACCTGCACGGAC  | NM_010493     |
|                                | REV: GTCACCGTTGTGATCCCTG   |               |
| <i>GAPDH</i>                   | FOR: CGTCCCGTAGACAAAATGGT  | NM_008084     |
|                                | REV: TTGATGGCAACAATCTCCAC  |               |

Table S2. Mass fragmentation ions of 3 components from OJE.

| Peak                                                                                     | Component                         | MW <sup>1)</sup> | Rt(min) <sup>2)</sup> | Fragment ions                                                                                                                                                                                                                                                                  |
|------------------------------------------------------------------------------------------|-----------------------------------|------------------|-----------------------|--------------------------------------------------------------------------------------------------------------------------------------------------------------------------------------------------------------------------------------------------------------------------------|
| 1                                                                                        | chlorogenic acid                  | 354              | 8.853                 | 377.0844 [M+Na] <sup>+</sup> ,<br>355.1025 [M+H] <sup>+</sup> ,<br>169.0389 [Caffeoyl] <sup>+</sup>                                                                                                                                                                            |
| 2                                                                                        | 5- <i>O</i> -feruloylquinic acid  | 368              | 12.978                | 391.1004 [M+Na] <sup>+</sup> ,<br>369.1180 [M+H] <sup>+</sup> ,<br>177.0546 [Fe <sup>3)</sup> +H-H <sub>2</sub> O] <sup>+</sup> ,<br>145.0285 [Fe+HH <sub>2</sub> O-CO-CH <sub>3</sub> ] <sup>+</sup> ,<br>117.0336 [Fe+H-H <sub>2</sub> O-CH <sub>3</sub> OH-CO] <sup>+</sup> |
| 3                                                                                        | rutin<br>(quercetin-3-rutinoside) | 610              | 16.834                | 633.1433 [M+Na] <sup>+</sup><br>611.1612 [M+H] <sup>+</sup><br>465.1033 [M+H-Rhamnose] <sup>+</sup><br>303.0502 [Quercetin aglycone+H] <sup>+</sup>                                                                                                                            |
| <sup>1)</sup> Molecular weight. <sup>2)</sup> Retention time. <sup>3)</sup> Ferulic acid |                                   |                  |                       |                                                                                                                                                                                                                                                                                |

Table S3. Histological scoring of colitis

| Parameter                                               | Scoring                                                                                                                 |
|---------------------------------------------------------|-------------------------------------------------------------------------------------------------------------------------|
| Crypt loss                                              | 0=normal<br>1=<10%<br>2=10%<br>3=10-15%<br>4=15-50%                                                                     |
| Erosions                                                | 0=intact epithelium<br>1=involvement of the lamina propria<br>2=involvement of the submucosa<br>3=transmural ulceration |
| Infiltration of mononuclear and polymorphonuclear cells | 0=absent<br>1=weak<br>2=moderate<br>3=severe                                                                            |
